# Supplementary material for: Evolution of Integrated Causal Structures in Animats Exposed to Environments of Increasing Complexity
Source: PubMed Central journal article supplement (PMC4270440; doi:10.1371/journal.pcbi.1003966), 2014-12-18

**Task 1****Task 2****Task 3****Task 4**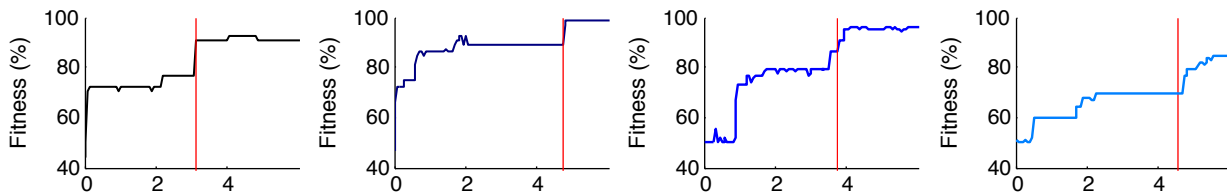

whole animal brain

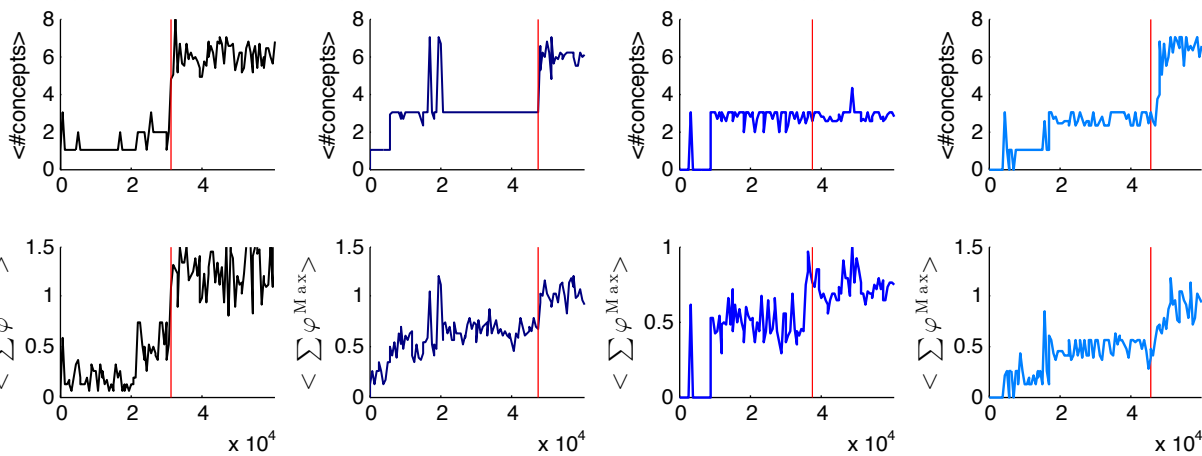

main complex

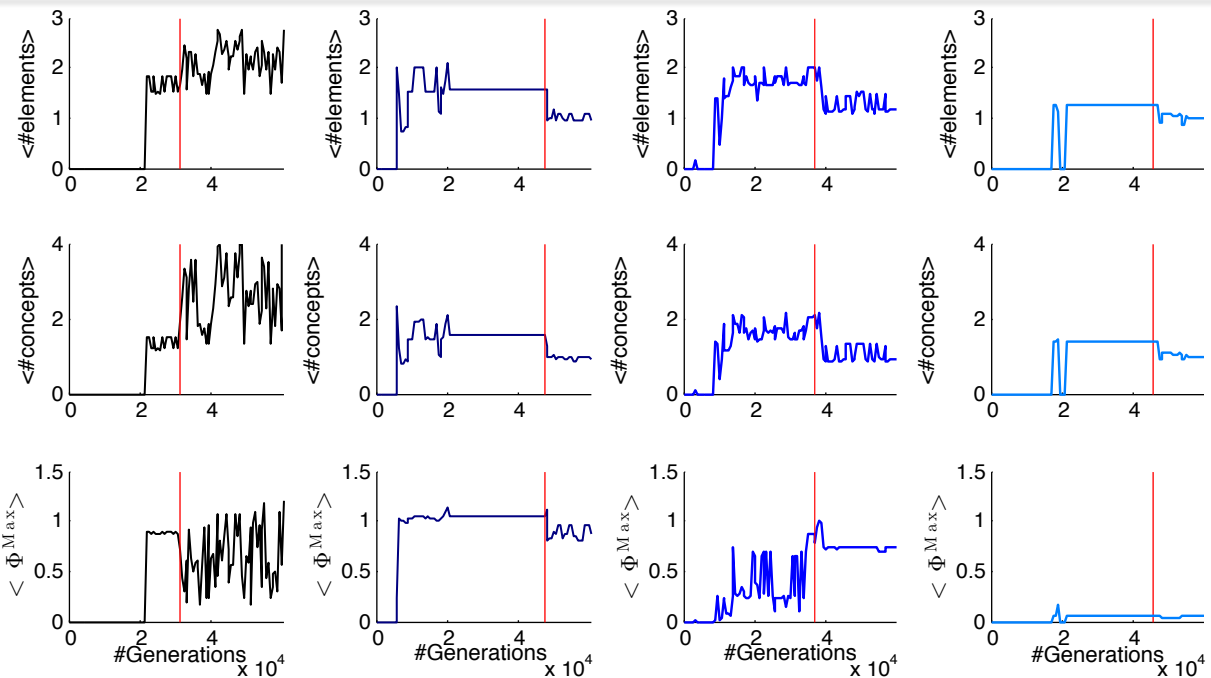

Supplement: pcbi.1003966.s002.pdf [file pcbi.1003966.s002.pdf]
