# Supplementary material for: Evolution of Integrated Causal Structures in Animats Exposed to Environments of Increasing Complexity
Source: PubMed Central journal article supplement (PMC4270440; doi:10.1371/journal.pcbi.1003966), 2014-12-18

# Task 1

# Task 2

# Task 3

# Task 4

Catch

1

1

1

4

3

6

Avoid

3

2

2

3

4

5

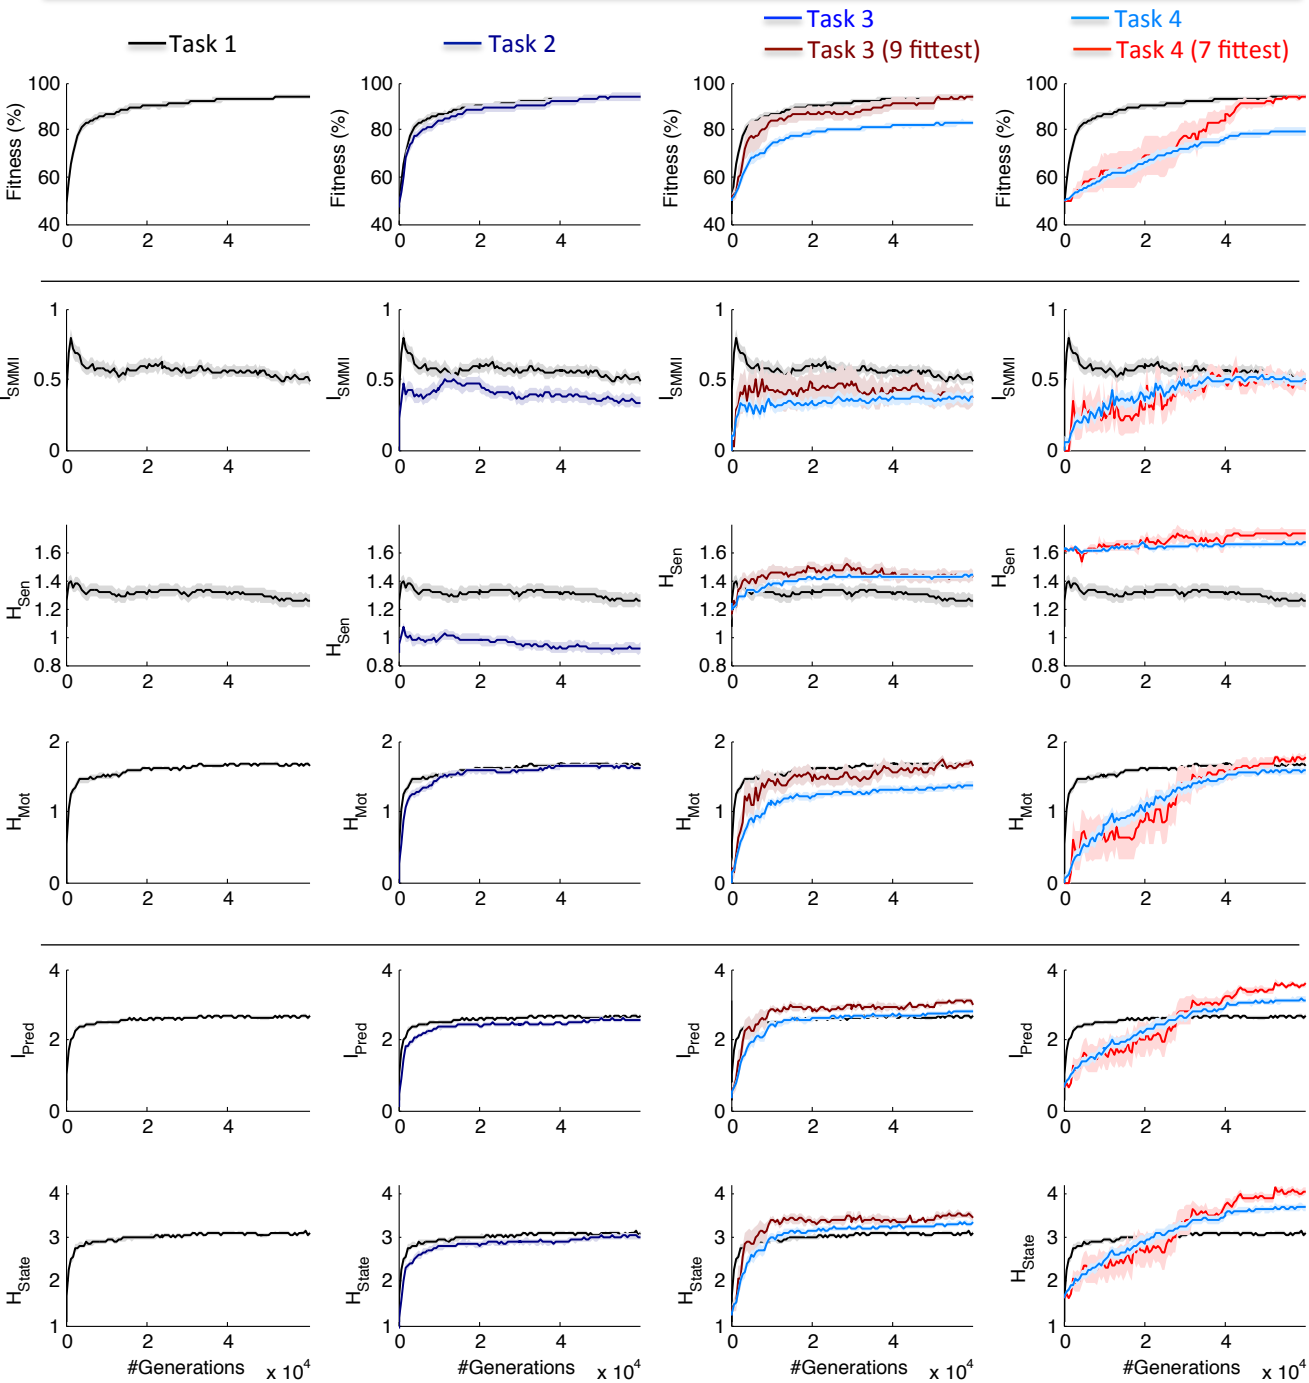

Supplement: pcbi.1003966.s004.pdf [file pcbi.1003966.s004.pdf]
