# Supplementary material for: Evolution of Integrated Causal Structures in Animats Exposed to Environments of Increasing Complexity
Source: PubMed Central journal article supplement (PMC4270440; doi:10.1371/journal.pcbi.1003966), 2014-12-18

# Task 1:

Catch

1

Avoid

3

— Task 1 — example of modular LOD — example of integrated LOD

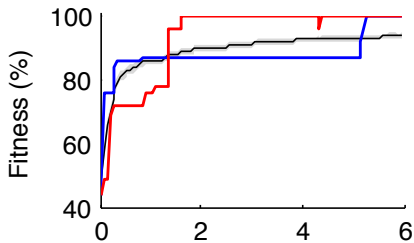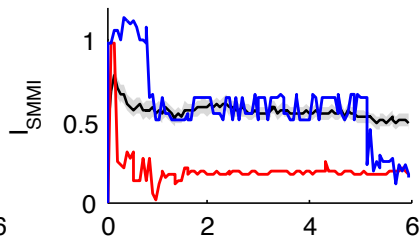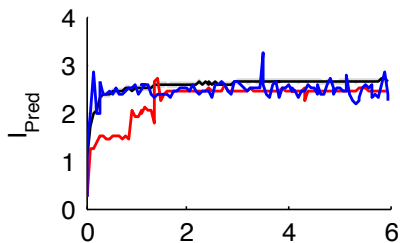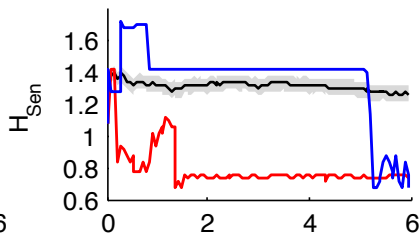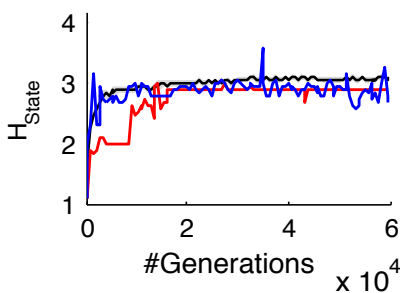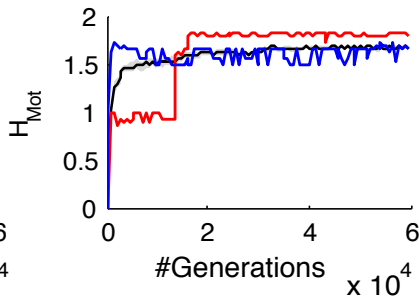

Supplement: pcbi.1003966.s005.pdf [file pcbi.1003966.s005.pdf]
